# Supplementary material for: Cardiac Alpha-Myosin (MYH6) Is the Predominant Sarcomeric Disease Gene for Familial Atrial Septal Defects
Source: PubMed Central journal article supplement (PMC3237499; doi:10.1371/journal.pone.0028872), 2011-12-14
Supplement: pone.0028872.s001.pdf [file pone.0028872.s001.pdf]

## Supporting data 1

Genetic variants found in 31 ASDII patients of Caucasian origin

| gene name | nucleotide change | amino acid change | web reference | number of affected individuals (Caucasian origin) | novel or putative disease associated variants | disease associated in pedigree | Allele frequencies according to EVS European / African |
|-----------|-------------------|-------------------|---------------|---------------------------------------------------|-----------------------------------------------|--------------------------------|--------------------------------------------------------|
| ACTC1     | c.-23+53C>T       |                   |               | 1                                                 | no                                            |                                |                                                        |
| ACTC1     | c.808+76G>C       |                   | rs3729755     | 12                                                | no                                            |                                |                                                        |
| ACTC1     | c.990+64C>T       |                   | rs2307494     | 1                                                 | no                                            |                                |                                                        |
| CAV3      | c.-67-117G>T      |                   | rs2072582     | 12                                                | no                                            |                                |                                                        |
| CAV3      | c.-1106G>A        |                   |               | 18                                                | no                                            |                                |                                                        |
| CAV3      | c.270C>T          | p.L9L             | rs1974763     | 8                                                 | no                                            |                                |                                                        |
| CAV3      | c.390C>T          | p.N33N            | rs1008642     | 19                                                | no                                            |                                |                                                        |
| CAV3      | c.114+26G>A       |                   |               | 1                                                 | no                                            |                                |                                                        |
| CAV3      | c.114+155C>A      |                   |               | 1                                                 | no                                            |                                |                                                        |
| CAV3      | c.114+171C>G      |                   | rs1558991     | 10                                                | no                                            |                                |                                                        |
| CAV3      | c.115-151A>G      |                   | rs6777678     | 10                                                | no                                            |                                |                                                        |
| CAV3      | c.115-89G>T       |                   | rs13060135    | 8                                                 | no                                            |                                |                                                        |
| CAV3      | c.115-23G>C       |                   | rs57159780    | 3                                                 | no                                            |                                |                                                        |
| CAV3      | c.123T>C          | p.F41F            |               | 11                                                | no                                            |                                |                                                        |
| CAV3      | c.*36G>C          |                   |               | 1                                                 | no                                            |                                |                                                        |
| CRYAB     | c.165G>A          | p.L55L            | rs2228387     | 2                                                 | no                                            |                                |                                                        |
| CRYAB     | c.324+4T>G        |                   | rs11603779    | 16                                                | no                                            |                                |                                                        |
| CSRP3     | c.150G>A          | p.A50A            | rs7124801     | 1                                                 | no                                            |                                |                                                        |
| CSRP3     | c.213C>T          | p.I71I            | rs45476991    | 2                                                 | no                                            |                                |                                                        |
| CSRP3     | c.336G>A          | p.A112A           | rs13451       | 3                                                 | no                                            |                                |                                                        |
| GLA       | c.-12G>A          |                   | rs3027585     | 3                                                 | no                                            |                                |                                                        |
| GLA       | c.-10C>T          |                   | rs2071225     | 4                                                 | no                                            |                                |                                                        |
| GLA       | c.51C>T           | p.R17R            |               | 1                                                 | no                                            |                                |                                                        |
| GLA       | c.427G>A          | p.A143T           |               | 1                                                 | no                                            |                                |                                                        |
| GLA       | c.630+68A>G       |                   | rs3027589     | 3                                                 | no                                            |                                |                                                        |
| GLA       | c.640-16A>G       |                   | rs2071397     | 6                                                 | no                                            |                                |                                                        |
| GLA       | c.1000-22C>T      |                   | rs2071228     | 8                                                 | no                                            |                                |                                                        |
| GLA       | c.1308+61T>G      |                   |               | 1                                                 | no                                            |                                |                                                        |
| GLA       | c.1308+84T>C      |                   |               | 1                                                 | no                                            |                                |                                                        |
| GLA       | c.1308+93G>A      |                   |               | 1                                                 | no                                            |                                |                                                        |
| GLA       | c.1308+136G>A     |                   | rs35019768    | 5                                                 | no                                            |                                |                                                        |
| GLA       | c.1308+138A>C     |                   |               | 1                                                 | no                                            |                                |                                                        |
| MYBPC3    | c.472G>A          | p.V158M           | rs3729986     | 1                                                 | no                                            |                                |                                                        |
| MYBPC3    | c.706A>G          | p.S236G           | rs3729989     | 7                                                 | no                                            |                                |                                                        |
| MYBPC3    | c.772+28G>T       |                   |               | 1                                                 | no                                            |                                |                                                        |
| MYBPC3    | c.786C>T          | p.T262T           | rs11570058    | 7                                                 | no                                            |                                |                                                        |
| MYBPC3    | c.1091-24C>T      |                   | rs2856650     | 6                                                 | no                                            |                                |                                                        |
| MYBPC3    | c.1223+29G>A      |                   | rs11570078    | 7                                                 | no                                            |                                |                                                        |
| MYBPC3    | c.1226+49T>C      |                   | rs896818      | 12                                                | no                                            |                                |                                                        |
| MYBPC3    | c.1608T>A         | p.A536A           |               | 1                                                 | no                                            |                                |                                                        |
| MYBPC3    | c.1897+24G>T      |                   |               | 1                                                 | no                                            |                                |                                                        |
| MYBPC3    | c.2308+18C>G      |                   | rs3729948     | 1                                                 | no                                            |                                |                                                        |
| MYBPC3    | c.2497G>A         | p.A833T           |               | 2                                                 | yes                                           | no                             | A=6/2174 A= 0/1292                                     |
| MYBPC3    | c.2547G>T         | p.V849V           | rs3729953     | 1                                                 | no                                            |                                |                                                        |
| MYBPC3    | c.2737+12C>T      |                   | rs3729836     | 1                                                 | no                                            |                                |                                                        |
| MYBPC3    | c.3191-21A>G      |                   | rs11570115    | 2                                                 | no                                            |                                |                                                        |
| MYBPC3    | c.3288G>A         | p.E1096E          | rs1052373     | 7                                                 | no                                            |                                |                                                        |
| MYBPC3    | c.3627+49C>T      |                   | rs3729802     | 3                                                 | no                                            |                                |                                                        |
| MYBPC3    | c.3815-66C>T      |                   | rs2290146     | 3                                                 | no                                            |                                |                                                        |
| MYH6      | c.-75-1T>C        |                   |               | 1                                                 | yes                                           | no                             | A=0/2692 A= 0/2168                                     |
| MYH6      | c.50G>A           | p.R17H            |               | 1                                                 | yes                                           | yes                            | A=0/2692 A= 0/2168                                     |
| MYH6      | c.166G>A          | p.G56R            | rs28711516    | 6                                                 | no                                            |                                |                                                        |
| MYH6      | c.201+16C>T       |                   | rs7147244     | 1                                                 | no                                            |                                |                                                        |
| MYH6      | c.346-121C>G      |                   |               | 2                                                 | no                                            |                                |                                                        |
| MYH6      | c.393G>A          | p.L131L           | rs17277970    | 6                                                 | no                                            |                                |                                                        |
| MYH6      | c.411G>A          | p.E137E           | rs2277474     | 12                                                | no                                            |                                |                                                        |
| MYH6      | c.427C>A          | p.R143R           | rs2277473     | 7                                                 | no                                            |                                |                                                        |
| MYH6      | c.531-86A>G       |                   | rs440466      | 10                                                | no                                            |                                |                                                        |
| MYH6      | c.735+159T>C      |                   | rs12889823    | 1                                                 | no                                            |                                |                                                        |
| MYH6      | c.736-105C>T      |                   | rs388914      | 12                                                | no                                            |                                |                                                        |
| MYH6      | c.736-69T>G       |                   |               | 3                                                 | no                                            |                                |                                                        |
| MYH6      | c.736-34G>A       |                   | rs11850295    | 1                                                 | no                                            |                                |                                                        |
| MYH6      | c.799+122G>A      |                   |               | 3                                                 | no                                            |                                |                                                        |
| MYH6      | c.800-11A>G       |                   | rs434273      | 25                                                | no                                            |                                |                                                        |
| MYH6      | c.896+175G>A      |                   | rs17091631    | 6                                                 | no                                            |                                |                                                        |
| MYH6      | c.999C>T          | p.T333T           |               | 2                                                 | no                                            |                                |                                                        |
| MYH6      | c.1003-29C>A      |                   | rs45466392    | 1                                                 | no                                            |                                |                                                        |
| MYH6      | c.1335C>T         | p.N445N           |               | 2                                                 | no                                            |                                |                                                        |
| MYH6      | c.1410+112T>C     |                   | rs28671012    | 7                                                 | no                                            |                                |                                                        |
| MYH6      | c.1582-39C>T      |                   | rs439735      | 11                                                | no                                            |                                |                                                        |
| MYH6      | c.1615T>C         | p.C539R           |               | 1                                                 | yes                                           | yes                            | C=0/2694 / C= 0/2170                                   |
| MYH6      | c.1628A>G         | p.K543R           |               | 1                                                 | yes                                           | yes                            | G=0/2694 / G=0/2170                                    |
| MYH6      | c.1891+170C>T     |                   | rs17091535    | 2                                                 | no                                            |                                |                                                        |
| MYH6      | c.1892-103C>G     |                   | rs28730775    | 2                                                 | no                                            |                                |                                                        |
| MYH6      | c.1962+39T>C      |                   | rs412768      | 16                                                | no                                            |                                |                                                        |
| MYH6      | c.1963-127C>T     |                   | rs17256246    | 3                                                 | no                                            |                                |                                                        |
| MYH6      | c.2151C>T         | p.Y717Y           |               | 3                                                 | no                                            |                                |                                                        |
| MYH6      | c.2168+26C>G      |                   |               | 3                                                 | no                                            |                                |                                                        |
| MYH6      | c.2292+18C>T      |                   | rs452036      | 18                                                | no                                            |                                |                                                        |
| MYH6      | c.2686-35T>C      |                   | rs28730773    | 3                                                 | no                                            |                                |                                                        |
| MYH6      | c.2946G>A         | p.E982E           |               | 2                                                 | no                                            |                                |                                                        |
| MYH6      | c.3010G>T         | p.A1004S          |               | 1                                                 | yes                                           | yes                            | T=3/2699 / T=0/2176                                    |
| MYH6      | c.3106-108T>C     |                   | rs17091453    | 2                                                 | no                                            |                                |                                                        |
| MYH6      | c.3302T>C         | p.V1101A          | rs365990      | 18                                                | no                                            |                                |                                                        |
| MYH6      | c.3343-59G>A      |                   |               | 1                                                 | no                                            |                                |                                                        |
| MYH6      | c.3388G>A         | p.A1130T          | rs28730771    | 10                                                | no                                            |                                |                                                        |
| MYH6      | c.3490C>T         | p.S1160S          |               | 1                                                 | no                                            |                                |                                                        |
| MYH6      | c.3573C>T         | p.A1191A          |               | 1                                                 | no                                            |                                |                                                        |
| MYH6      | c.3609C>G         | p.A1203A          |               | 1                                                 | yes                                           | no                             | G=0/2292 / G=35/1919                                   |
| MYH6      | c.3627C>T         | p.I1209I          |               | 1                                                 | yes                                           | no                             | T=0/2554 / T=45/2081                                   |
| MYH6      | c.3733-78C>A      |                   |               | 1                                                 | no                                            |                                |                                                        |
| MYH6      | c.3978+166T>C     |                   | rs73604577    | 1                                                 | no                                            |                                |                                                        |
| MYH6      | c.4011G>A         | p.S1337S          | rs451794      | 4                                                 | no                                            |                                |                                                        |
| MYH6      | c.4136C>T         | p.T1379M          |               | 1                                                 | no                                            |                                |                                                        |
| MYH6      | c.4359+13C>T      |                   | rs8022522     | 13                                                | no                                            |                                |                                                        |
| MYH6      | c.4526-34T>C      |                   | rs178642      | 18                                                | no                                            |                                |                                                        |
| MYH6      | c.4650+24C>T      |                   | rs45536340    | 4                                                 | no                                            |                                |                                                        |
| MYH6      | c.4651-17G>A      |                   | rs2071634     | 1                                                 | no                                            |                                |                                                        |
| MYH6      | c.4914T>C         | p.A1638A          | rs178640      | 11                                                | no                                            |                                |                                                        |
| MYH6      | c.4959+46G>C      |                   | rs396024      | 4                                                 | no                                            |                                |                                                        |
| MYH6      | c.4960-86G>A      |                   | rs45520434    | 4                                                 | no                                            |                                |                                                        |
| MYH6      | c.4980C>T         | p.D1660D          | rs382872      | 4                                                 | no                                            |                                |                                                        |
| MYH6      | c.5164-102T>A     |                   | rs178639      | 17                                                | no                                            |                                |                                                        |
| MYH6      | c.5164-74T>C      |                   | rs178638      | 16                                                | no                                            |                                |                                                        |
| MYH6      | c.5164-22A>G      |                   | rs178637      | 2                                                 | no                                            |                                |                                                        |
| MYH6      | c.5259C>T         | p.A1753A          | rs8004990     | 3                                                 | no                                            |                                |                                                        |
| MYH6      | c.5565+22A>G      |                   | rs8006357     | 14                                                | no                                            |                                |                                                        |
| MYH6      | c.5566-122A>C     |                   | rs35182223    | 14                                                | no                                            |                                |                                                        |
| MYH6      | c.5662-111G>T     |                   | rs10135780    | 6                                                 | no                                            |                                |                                                        |
| MYH6      | c.5662-103T>C     |                   | rs178636      | 1                                                 | no                                            |                                |                                                        |
| MYH6      | c.5797-128G>A     |                   | rs453361      | 4                                                 | no                                            |                                |                                                        |

|        |               |          |            |    |    |
|--------|---------------|----------|------------|----|----|
| MYH7   | c.-120-387G>A |          |            | 1  | no |
| MYH7   | c.-120-198A>T |          |            | 1  | no |
| MYH7   | c.-36C>T      |          | rs45497293 | 2  | no |
| MYH7   | c.-9+23T>C    |          | rs2239578  | 10 | no |
| MYH7   | c.-6-25G>T    |          | rs3729922  | 2  | no |
| MYH7   | c.189C>T      | p.T63T   | rs2069540  | 10 | no |
| MYH7   | c.597A>G      | p.A199A  | rs2069541  | 1  | no |
| MYH7   | c.732C>T      | p.F244F  | rs2069542  | 5  | no |
| MYH7   | c.975C>T      | p.D325D  | rs2231124  | 2  | no |
| MYH7   | c.998+44T>C   |          | rs3729810  | 2  | no |
| MYH7   | c.1062C>T     | p.G354G  | rs735712   | 2  | no |
| MYH7   | c.1095G>A     | p.K365K  | rs735711   | 4  | no |
| MYH7   | c.1128C>T     | p.D376D  | rs2231126  | 1  | no |
| MYH7   | c.2163-56A>G  |          | rs3729818  | 3  | no |
| MYH7   | c.2424-58G>A  |          | rs45571436 | 2  | no |
| MYH7   | c.2967T>C     | p.I989I  | rs7157716  | 8  | no |
| MYH7   | c.3853+21C>T  |          | rs45584435 | 1  | no |
| MYH7   | c.3853+27T>A  |          | rs2277475  | 5  | no |
| MYH7   | c.3972+62A>C  |          | rs28730782 | 3  | no |
| MYH7   | c.3973-75G>A  |          | rs45550632 | 2  | no |
| MYH7   | c.3973-30A>G  |          | rs7159367  | 5  | no |
| MYH7   | c.3973-28C>T  |          |            | 1  | no |
| MYH7   | c.4520-63G>A  |          | rs3729825  | 4  | no |
| MYH7   | c.494+80C>T   |          | rs3729828  | 5  | no |
| MYH7   | c.5106G>A     | p.A1702A | rs3729830  | 2  | no |
| MYH7   | c.5284-45G>T  |          | rs45468101 | 2  | no |
| MYH7   | c.5559+67A>T  |          | rs3729832  | 2  | no |
| MYH7   | c.5655+21C>T  |          | rs3729499  | 1  | no |
| MYH7   | c.5655+32G>A  |          | rs3729833  | 4  | no |
| MYH7   | c.5791-64A>G  |          | rs2284651  | 7  | no |
| MYH7   | c.5924+27C>A  |          | rs12147570 | 4  | no |
| MYH7   | c.*113G>A     |          | rs17794387 | 2  | no |
| MYL2   | c.4-77A>T     |          | rs10849917 | 3  | no |
| MYL2   | c.132T>C      | p.I44I   | rs2301610  | 3  | no |
| MYL2   | c.274+27C>A   |          |            | 1  | no |
| MYL2   | c.274+53G>A   |          | rs11065770 | 2  | no |
| MYL2   | c.275-58G>A   |          | rs2071629  | 3  | no |
| MYL2   | c.353+51C>T   |          | rs2233260  | 5  | no |
| MYL2   | c.756+76G>C   |          | rs12812271 | 8  | no |
| MYL3   | c.129+44G>T   |          | rs936175   | 6  | no |
| MYL3   | c.307+37A>C   |          | rs2227294  | 6  | no |
| MYL3   | c.*89G>A      |          |            | 5  | no |
| PRKAG2 | c.-90G>T      |          |            | 1  | no |
| PRKAG2 | c.-26C>T      |          |            | 3  | no |
| PRKAG2 | c.*114+12C>T  |          |            | 5  | no |
| PRKAG2 | c.*114+43C>T  |          |            | 1  | no |
| PRKAG2 | c.186+111T>C  |          | rs12671980 | 23 | no |
| PRKAG2 | c.187-96G>A   |          | rs12375159 | 7  | no |
| PRKAG2 | c.187-85A>G   |          | rs12374732 | 12 | no |
| PRKAG2 | c.466+51T>C   |          |            | 8  | no |
| PRKAG2 | c.467-172C>T  |          |            | 1  | no |
| PRKAG2 | c.754+141G>T  |          |            | 1  | no |
| PRKAG2 | c.865-151A>G  |          | rs3762014  | 8  | no |
| PRKAG2 | c.1006-168A>G |          |            | 4  | no |
| PRKAG2 | c.1006-121G>A |          |            | 4  | no |
| PRKAG2 | c.1006-95A>T  |          | rs17134620 | 5  | no |
| PRKAG2 | c.1006-83C>A  |          |            | 1  | no |
| PRKAG2 | c.1052-86C>T  |          | rs2302530  | 10 | no |
| PRKAG2 | c.1052-42C>T  |          | rs2302531  | 5  | no |
| PRKAG2 | c.1233+88G>A  |          | rs2241053  | 8  | no |
| PRKAG2 | c.1437+47A>G  |          |            | 1  | no |
| PRKAG2 | c.1437+127T>G |          | rs2302532  | 7  | no |
| PRKAG2 | c.1438-80G>C  |          |            | 1  | no |
| PRKAG2 | c.*112A>G     |          | rs8961     | 23 | no |
| PRKAG2 | c.*301A>G     |          |            | 1  | no |
| TCAP   | c.316C>T      | p.R106C  | rs45578741 | 1  | no |
| TCAP   | c.453A>C      | p.A151A  | rs1053651  | 17 | no |
| TCAP   | c.950+7C>G    |          | rs45593534 | 1  | no |
| TCAP   | c.*199G>T     |          | rs45503594 | 3  | no |
| TNNC1  | c.-27-144G>A  |          | rs1035002  | 29 | no |
| TNNI3  | c.-98C>A      |          | rs12973773 | 2  | no |
| TNNI3  | c.25-8T>A     |          | rs3729836  | 12 | no |
| TNNI3  | c.108+21G>A   |          | rs3729837  | 6  | no |
| TNNI3  | c.204G>T      | p.R68R   | rs3729711  | 6  | no |
| TNNI3  | c.373-10T>G   |          | rs7252610  | 25 | no |
| TNNI3  | c.537G>A      | p.E179E  | rs3729841  | 7  | no |
| TNNT2  | c.-72-240C>T  |          | rs45529540 | 2  | no |
| TNNT2  | c.134-50G>A   |          | rs3729843  | 6  | no |
| TNNT2  | c.203+67G>A   |          | rs1573230  | 12 | no |
| TNNT2  | c.207G>A      | p.S69S   | rs3729845  | 2  | no |
| TNNT2  | c.318C>T      | p.I106I  | rs3729547  | 10 | no |
| TNNT2  | c.571-32A>C   |          | rs1104859  | 10 | no |
| TNNT2  | c.579+68C>T   |          |            | 1  | no |
| TNNT2  | c.690-86T>C   |          | rs2275861  | 5  | no |
| TNNT2  | c.781-33C>T   |          | rs2275863  | 2  | no |
| TNNT2  | c.*71C>T      |          | rs3730244  | 1  | no |
| TPM1   | c.241-88G>A   |          |            | 20 | no |
| TPM1   | c.241-52T>A   |          | rs28485524 | 6  | no |
| TPM1   | c.375-75A>G   |          | rs4775614  | 27 | no |
| TPM1   | c.453C>A      | p.A151A  |            | 27 | no |
| TPM1   | c.486T>C      | p.Y162Y  | rs11558747 | 2  | no |
| TPM1   | c.639+22G>C   |          | rs28730802 | 1  | no |
| TPM1   | c.773-82G>A   |          |            | 6  | no |
| TPM1   | c.*148G>T     |          | rs7668     | 2  | no |
