# Supplementary material for: Cardiac Alpha-Myosin (MYH6) Is the Predominant Sarcomeric Disease Gene for Familial Atrial Septal Defects
Source: PubMed Central journal article supplement (PMC3237499; doi:10.1371/journal.pone.0028872), 2011-12-14
Supplement: pone.0028872.s002.pdf [file pone.0028872.s002.pdf]

# Supporting data 2

**A**

**R17H**

|              | 1                               | 5        | 10      | 15      | 20     | 25    | 30    |                 |
|--------------|---------------------------------|----------|---------|---------|--------|-------|-------|-----------------|
|              | ... ... ... ... ... ... ... ... |          |         |         |        |       |       |                 |
| myh6         | MTDAQMA                         | DFGAAQYL | RKSEKER | LEAQTR  | PFDP   |       |       | Class II        |
| myh6_c/2mys  | SPDAEMA                         | AFGEA    | APYLR   | RKSEKER | TEAQN  | KPF   | FD    |                 |
| myh15        | LIKMDLS                         | DLG      | AAAFIR  | RS      | EAE    | LLLL  | QAT   | ALD             |
| myh7b        | TAMMDV                          | S        | ELGES   | SARYLR  | QGYQ   | EMT   | KVHTI | PWD             |
| myh7         | MGDSEMA                         | VF       | GAAAPYL | RKSEKER | LEAQTR | PFDP  |       |                 |
| myh13        | SSDAEMA                         | IF       | GEAAPYL | RKPEKER | IEAQN  | RPF   | FD    |                 |
| myh3         | SSDTEME                         | VF       | GIAAPFL | RKSEKER | IEAQN  | QPF   | FD    |                 |
| myh8         | SSDAEMA                         | VF       | GEAAPYL | RKSEKER | IEAQN  | KPF   | FD    |                 |
| myh4         | SSDSEMA                         | IF       | GEAAPFL | RKSEKER | IEAQN  | KPF   | FD    |                 |
| myh1         | SSDSEMA                         | IF       | GEAAPFL | RKSERER | IEAQN  | KPF   | FD    |                 |
| myh2         | SSDSELA                         | VF       | GEAAPFL | RKSERER | IEAQN  | RPF   | FD    |                 |
| myh14        | VPEAAQ                          | PF       | LFT     | PRG     | PSA    | GGG   | PGSGT | S               |
| myh11        | -MAQK                           | QLS      | DD      | DKF     | LV     | DKNF  | INS   | EVAQADWA        |
| myh11_c/1br2 | --MSQ                           | PLS      | DD      | DKF     | LV     | DKNF  | VNN   | PLAQADWS        |
| myh10        | -MAQT                           | GLE      | DD      | PER     | LV     | DRAVI | YN    | PATQADWT        |
| myh9         | -----                           | MAQQA    | AD      | KYLV    | VDKNF  | INN   | PLA   | QADWA           |
| myo5c        | -----                           | MAVAE    | LYT     | QYNRV   | WLP    | DP    | BE    | VWVK Class V    |
| myo5b        | -----                           | MSVGE    | LYS     | QCTRV   | WLP    | DP    | DE    | VWVR            |
| myo5a_c/1oe9 | -----                           | MAASE    | LYT     | KYARV   | WLP    | DP    | BE    | VWVK            |
| myo5a        | -----                           | MAASE    | LYT     | KFARV   | WLP    | DP    | BE    | VWVK            |
| myo9a        | HTLRIY                          | PGA      | IS      | EGT     | IY     | CEI   | PARKN | STA             |
| myo9b        | HLHYT                           | PQL      | ST      | TES     | QA     | SCR   | V     | TATK            |
| myo6         | -----                           | MEDG     | KP      | VWA     | PH     | ---   | PTD   | Class VI        |
| myo6_p/2bkh  | -----                           | MEDG     | KP      | VWA     | PH     | ---   | PTD   |                 |
| myo7a        | -----                           | MVIL     | Q       | GDH     | VW     | MDL   | R     | LGQEF Class VII |
| myo7b        | -----                           | MSG      | ER      | LG      | DH     | VW    | LE    | PPSTHKT         |
| myo10        | -----                           | MDNF     | HT      | EG      | TR     | VW    | LR    | ----- Class X   |

**A1004S**

**C**

|              | 995             | 1000  | 1005  | 1010  |          |
|--------------|-----------------|-------|-------|-------|----------|
|              | ... ... ... ... |       |       |       |          |
| myh6         | TKEKKAL         | QEAHQ | QALDD |       | Class II |
| myh6_c/2mys  | TKEKKAL         | QEAHQ | QTLDD |       |          |
| myh15        | NRAAKV          | VQEA  | AHQ   | QTLDD |          |
| myh7b        | TKEKKAL         | QEAHQ | QALGD |       |          |
| myh7         | TKEKKAL         | QEAHQ | QALDD |       |          |
| myh13        | TKEKKS          | LQEA  | AHQ   | QTLDD |          |
| myh3         | TREKKAL         | QEAHQ | QALDD |       |          |
| myh8         | SKEKKAL         | QEAHQ | QTLDD |       |          |
| myh4         | TKEKKAL         | QEAHQ | QTLDD |       |          |
| myh1         | TKEKKAL         | QEAHQ | QTLDD |       |          |
| myh2         | TKEKKAL         | QEAHQ | QTLDD |       |          |
| myh14        | SKERKLE         | EDR   | LA    | EFSSQ |          |
| myh11        | SKERKLE         | ER    | IS    | DLTTN |          |
| myh11_c/1br2 | TKEK            | KL    | LE    | ER    | VS       |
| myh10        | IKEK            | KL    | ME    | DR    | LA       |
| myh9         | AKEK            | KL    | LE    | DR    | LA       |

**B**

**C539R K543R**

|              | 530                            | 535   | 540 | 545 | 550 | 555 |     |
|--------------|--------------------------------|-------|-----|-----|-----|-----|-----|
|              | -- ... ... ... ... ... ... ... |       |     |     |     |     |     |
| myh6         | --GIMS                         | ILEEE | CM  | --- | FPK | AT  | DMT |
| myh6_c/2mys  | --GIFS                         | ILEEE | CM  | --- | FPK | AT  | DTS |
| myh15        | --GILS                         | ILEEE | CM  | --- | FPK | AT  | DL  |
| myh7b        | --GILS                         | ILEEE | CM  | --- | FPK | AS  | DA  |
| myh7         | --GIMS                         | ILEEE | CM  | --- | FPK | AT  | DM  |
| myh13        | --GIFS                         | ILEEE | CM  | --- | FPK | AT  | DTS |
| myh3         | --GIFS                         | ILEEE | CM  | --- | FPK | AT  | DTS |
| myh8         | --GIFS                         | ILEEE | CM  | --- | FPK | AT  | DTS |
| myh4         | --GIFS                         | ILEEE | CM  | --- | FPK | AT  | DTS |
| myh1         | --GIFS                         | ILEEE | CM  | --- | FPK | AT  | DTS |
| myh2         | --GIFS                         | ILEEE | CM  | --- | FPK | AT  | DTS |
| myh14        | PPGL                           | L     | L   | L   | D   | E   | E   |
| myh11        | PPGV                           | L     | L   | L   | D   | E   | E   |
| myh11_c/1br2 | PPG                            | V     | L   | L   | L   | D   | E   |
| myh10        | PPGV                           | L     | L   | L   | D   | E   | E   |
| myh9         | PPG                            | I     | L   | L   | D   | E   | E   |
| myo1e        | PPG                            | I     | M   | S   | V   | L   | D   |
| myo1f        | PPG                            | I     | M   | S   | V   | L   | D   |
| myo1d        | --GI                           | I     | A   | I   | L   | D   | D   |
| myo1g        | --GI                           | L     | A   | V   | L   | D   | E   |
| myo1c        | --GI                           | I     | S   | I   | L   | D   | E   |
| myo1h        | --GI                           | I     | S   | I   | L   | D   | E   |
| myo1a        | --GI                           | L     | A   | M   | L   | D   | E   |
| myo1b        | --GI                           | L     | A   | M   | L   | D   | E   |
| myo5c        | --GILE                         | L     | L   | D   | E   | E   | C   |
| myo5b        | --GILD                         | L     | L   | D   | E   | E   | C   |
| myo5a_c/1oe9 | --G                            | V     | L   | D   | L   | L   | D   |
| myo5a        | --GILD                         | L     | L   | D   | E   | E   | C   |
| myo15a       | --GIL                          | R     | I   | L   | D   | D   | C   |
| myo9a        | --GLL                          | H     | L   | L   | D   | E   | E   |
| myo9b        | --GLF                          | Y     | L   | L   | D   | E   | E   |
| myo6         | --GILD                         | I     | L   | D   | E   | E   | N   |
| myo6_p/2bkh  | --GILD                         | I     | L   | D   | E   | E   | N   |
| myo7a        | --NI                           | I     | S   | L   | D   | E   | E   |
| myo7b        | --SI                           | I     | S   | L   | L   | D   | E   |
| myo10        | --GLL                          | L     | A   | L   | I   | N   | E   |
| myo3a        | --G                            | L     | L   | S   | L   | L   | D   |
| myo3b        | --G                            | L     | L   | A   | L   | L   | D   |
| myo18a       | ARGL                           | L     | W   | L   | L   | E   | E   |
| myo18b       | ARGL                           | F     | W   | L   | D   | E   | E   |
