# Supplementary material for: Cardiac Alpha-Myosin (MYH6) Is the Predominant Sarcomeric Disease Gene for Familial Atrial Septal Defects
Source: PubMed Central journal article supplement (PMC3237499; doi:10.1371/journal.pone.0028872), 2011-12-14
Supplement: pone.0028872.s003.pdf [file pone.0028872.s003.pdf]

## Supporting data 3

| Gene name | Species       | description                                       | class       | Gene id | Homologene protein | SwissProt | Myosin_head | switch I region | switch II region | Motor_domain |
|-----------|---------------|---------------------------------------------------|-------------|---------|--------------------|-----------|-------------|-----------------|------------------|--------------|
| MYH1      | Homo sapiens  | myosin, heavy chain 1, skeletal muscle, adult     | class II    | 4619    | 117708             | 115527082 | 89..770     | 243..248        | 465..472         |              |
| MYH10     | Homo sapiens  | myosin, heavy chain 10, non-muscle                | class II    | 4628    | 55941              | 41406064  | 87..771     | 238..243        | 460..467         |              |
| MYH11     | Homo sapiens  | myosin, heavy chain 11, smooth muscle             | class II    | 4629    | 68258              | 92091586  | 87..778     | 245..250        | 467..474         |              |
| MYH11     | Gallus gallus | myosin, heavy chain 11, smooth muscle             | class II    | 396211  | 68258              | 45384060  | MYH11_CHICK | 86..777         | 244..249         | 466..473     |
| MYH13     | Homo sapiens  | myosin, heavy chain 13, skeletal muscle           | class II    | 8735    | 55780              | 110624781 | 89..770     | 242..247        | 464..471         |              |
| MYH14     | Homo sapiens  | myosin, heavy chain 14, non-muscle                | class II    | 79784   | 23480              | 116284396 | 108..796    | 266..271        | 487..494         |              |
| MYH15     | Homo sapiens  | myosin, heavy chain 15                            | class II    | 22989   | 18929              | 150010558 | 106..778    | 253..258        | 474..481         |              |
| MYH16     | Homo sapiens  | myosin, heavy chain 16 pseudogene                 |             |         |                    |           |             |                 |                  |              |
| MYH2      | Homo sapiens  | myosin, heavy chain 2, skeletal muscle, adult     | class II    | 4620    | 75068              | 153791586 | 89..772     | 243..248        | 465..472         |              |
| MYH3      | Homo sapiens  | myosin, heavy chain 3, skeletal muscle, embryonic | class II    | 4621    | 20553              | 98986453  | 89..767     | 241..246        | 463..470         |              |
| MYH4      | Homo sapiens  | myosin, heavy chain 4, skeletal muscle            | class II    | 4622    | 23019              | 110611903 | 89..770     | 243..248        | 465..472         |              |
| MYH6      | Gallus gallus | myosin, heavy chain 6, cardiac muscle, alpha      | class II    | 427788  | 23019*             | 13432175  | MYSS_CHICK  | 90..769         | 243..248         |              |
| MYH6      | Homo sapiens  | myosin, heavy chain 6, cardiac muscle, alpha      | class II    | 4624    | 124414             | 317373582 | MYH6_HUMAN  | 88..768         | 241..246         | 463..470     |
| MYH7      | Homo sapiens  | myosin, heavy chain 7, cardiac muscle, beta       | class II    | 4625    | 68044              | 115496169 | MYH7_HUMAN  | 88..766         | 240..245         | 462..469     |
| MYH7B     | Homo sapiens  | myosin, heavy chain 7B, cardiac muscle, beta      | class II    | 57644   | 66117              | 114842389 |             | 128..815        | 285..290         | 507..514     |
| MYH8      | Homo sapiens  | myosin, heavy chain 8, skeletal muscle, perinatal | class II    | 4626    | 68256              | 153945790 | 91..769     | 243..248        | 465..472         |              |
| MYH9      | Homo sapiens  | myosin, heavy chain 9, non-muscle                 | class II    | 4627    | 68257              | 12667788  | 83..764     | 231..236        | 453..460         |              |
| MYO1A     | Homo sapiens  | myosin IA                                         | class I     | 4640    | 21113              | 4885503   | 27..681     | 156..160        | 381..388         |              |
| MYO1B     | Homo sapiens  | myosin IB                                         | class I     | 4430    | 7856               | 44889481  | 19..688     | 163..167        | 388..395         |              |
| MYO1C     | Homo sapiens  | myosin IC                                         | class I     | 4641    | 32046              | 124494238 | 48..718     | 195..199        | 422..429         |              |
| MYO1D     | Homo sapiens  | myosin ID                                         | class I     | 4642    | 45576              | 51100974  | 13..682     | 159..163        | 384..391         |              |
| MYO1E     | Homo sapiens  | myosin IE                                         | class I     | 4643    | 55864              | 55956916  | 21..679     | 167..171        | 389..396         |              |
| MYO1F     | Homo sapiens  | myosin IF                                         | class I     | 4542    | 56276              | 27544941  | 19..677     | 165..169        | 387..394         |              |
| MYO1G     | Homo sapiens  | myosin IG                                         | class I     | 64005   | 27996              | 239582755 | 12..694     | 159..163        | 396..403         |              |
| MYO1H     | Homo sapiens  | myosin IH                                         | class I     | 283446  | 82639              | 254028267 | 13..678     | 160..164        | 382..389         |              |
| MYO3A     | Homo sapiens  | myosin IIIA                                       | class III   | 53904   | 49486              | 145275208 | 340..1041   | 484..488        | 718..725         | <923..1052   |
| MYO3B     | Homo sapiens  | myosin IIIB                                       | class III   | 140469  | 51393              | 284172512 | 358..1056   | 489..493        | 723..730         |              |
| MYO5A     | Gallus gallus | myosin VA (heavy chain 12, myoxin)                | class V     | 396237  | 20100              | 547967    | MYO5A_CHICK | 73..752         |                  | 438..445     |
| MYO5A     | Homo sapiens  | myosin VA (heavy chain 12, myoxin)                | class V     | 4644    | 20100              | 215982794 |             | 73..751         | 217..221         | 438..445     |
| MYO5B     | Homo sapiens  | myosin VB                                         | class V     | 4645    | 49481              | 122937345 | 73..749     | 217..221        | 439..446         |              |
| MYO5C     | Homo sapiens  | myosin VC                                         | class V     | 55930   | 68947              | 153945715 | 71..741     | 215..219        | 436..443         |              |
| MYO6      | Homo sapiens  | myosin VI                                         | class VI    | 4646    | 56417              | 92859701  | 59..759     | 203..207        | 457..464         |              |
| MYO6      | Sus scrofa    | myosin VI                                         | class VI    | 397085  | nil                | 47522864  | MYO6_PIG    | 59..760         | 203..207         | 458..465     |
| MYO7A     | Homo sapiens  | myosin VIIA                                       | class VII   | 4647    | 219                | 189083798 |             | 67..729         | 210..214         | 438..445     |
| MYO7B     | Homo sapiens  | myosin VIIB                                       | class VII   | 4648    | 81947              | 122937512 |             | 67..748         |                  | 66..759      |
| MYO9A     | Homo sapiens  | myosin IXA                                        | class IX    | 4649    | 21371              | 156119615 |             | 149..683>       |                  | 140..714     |
| MYO9B     | Homo sapiens  | myosin IXB                                        | class IX    | 4650    | 3058               | 33356170  |             | 147..666>       |                  | 140..695     |
| MYO10     | Homo sapiens  | myosin X                                          | class X     | 4651    | 36328              | 154354979 | 65..725     | 218..222        | 435..442         |              |
| MYO15A    | Homo sapiens  | myosin XVA                                        | class XV    | 51168   | 56504              | 118402590 | 1224..1887  | 1368..1372      | 1589..1596       |              |
| MYO18A    | Homo sapiens  | myosin XVIII A                                    | class XVIII | 399687  | 7977               | 28416946  | 407..1173   | 553..557        | 796..803         |              |
| MYO18B    | Homo sapiens  | myosin XVIII B                                    | class XVIII | 84700   | 53435              | 51317366  | 573..1321   | 714..718        | 952..959         |              |
