# Supplementary material for: Cardiac Alpha-Myosin (MYH6) Is the Predominant Sarcomeric Disease Gene for Familial Atrial Septal Defects
Source: PubMed Central journal article supplement (PMC3237499; doi:10.1371/journal.pone.0028872), 2011-12-14

Supplemental Figure 2

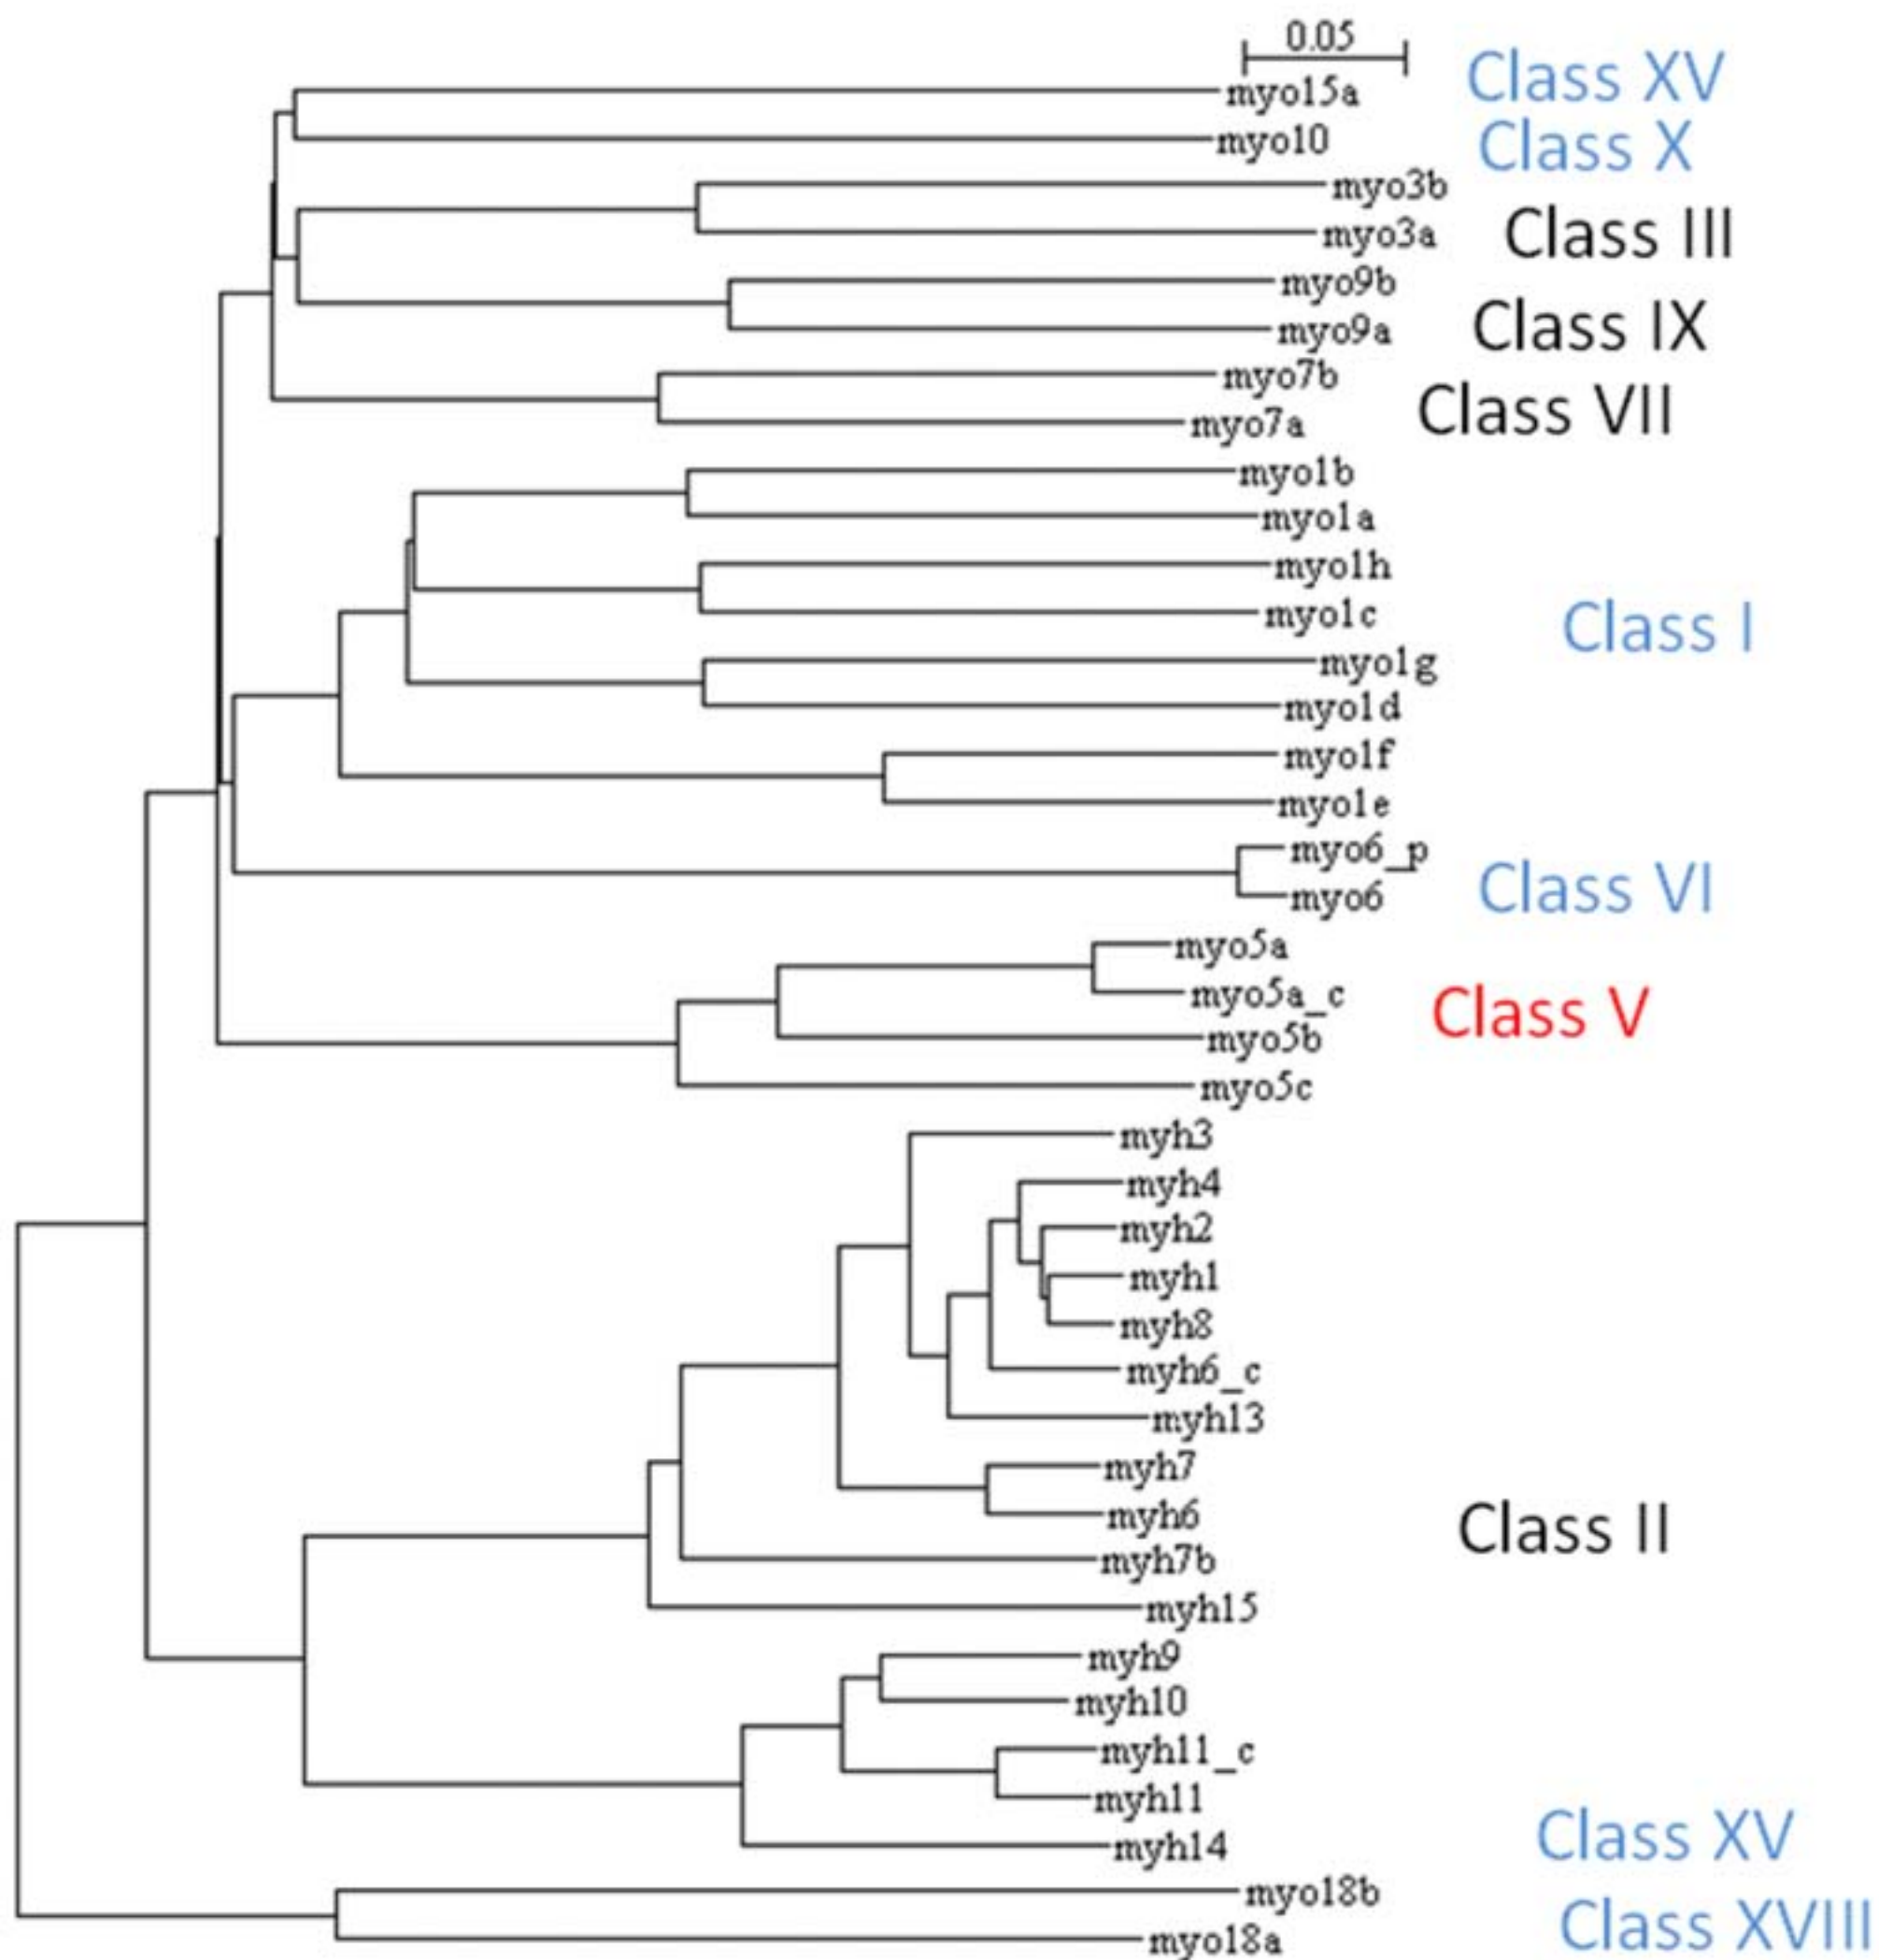

Supplement: pone.0028872.s004.pdf [file pone.0028872.s004.pdf]
